# Supplementary figures and images for: High dose-rate brachytherapy of localized prostate cancer converts tumors from cold to hot
Source: PubMed Central journal article supplement — J Immunother Cancer. 2020 Jun 24;8(1):e000792. doi: 10.1136/jitc-2020-000792 (PMC7319782; doi:10.1136/jitc-2020-000792), 2020-06-24

Graphical Abstract

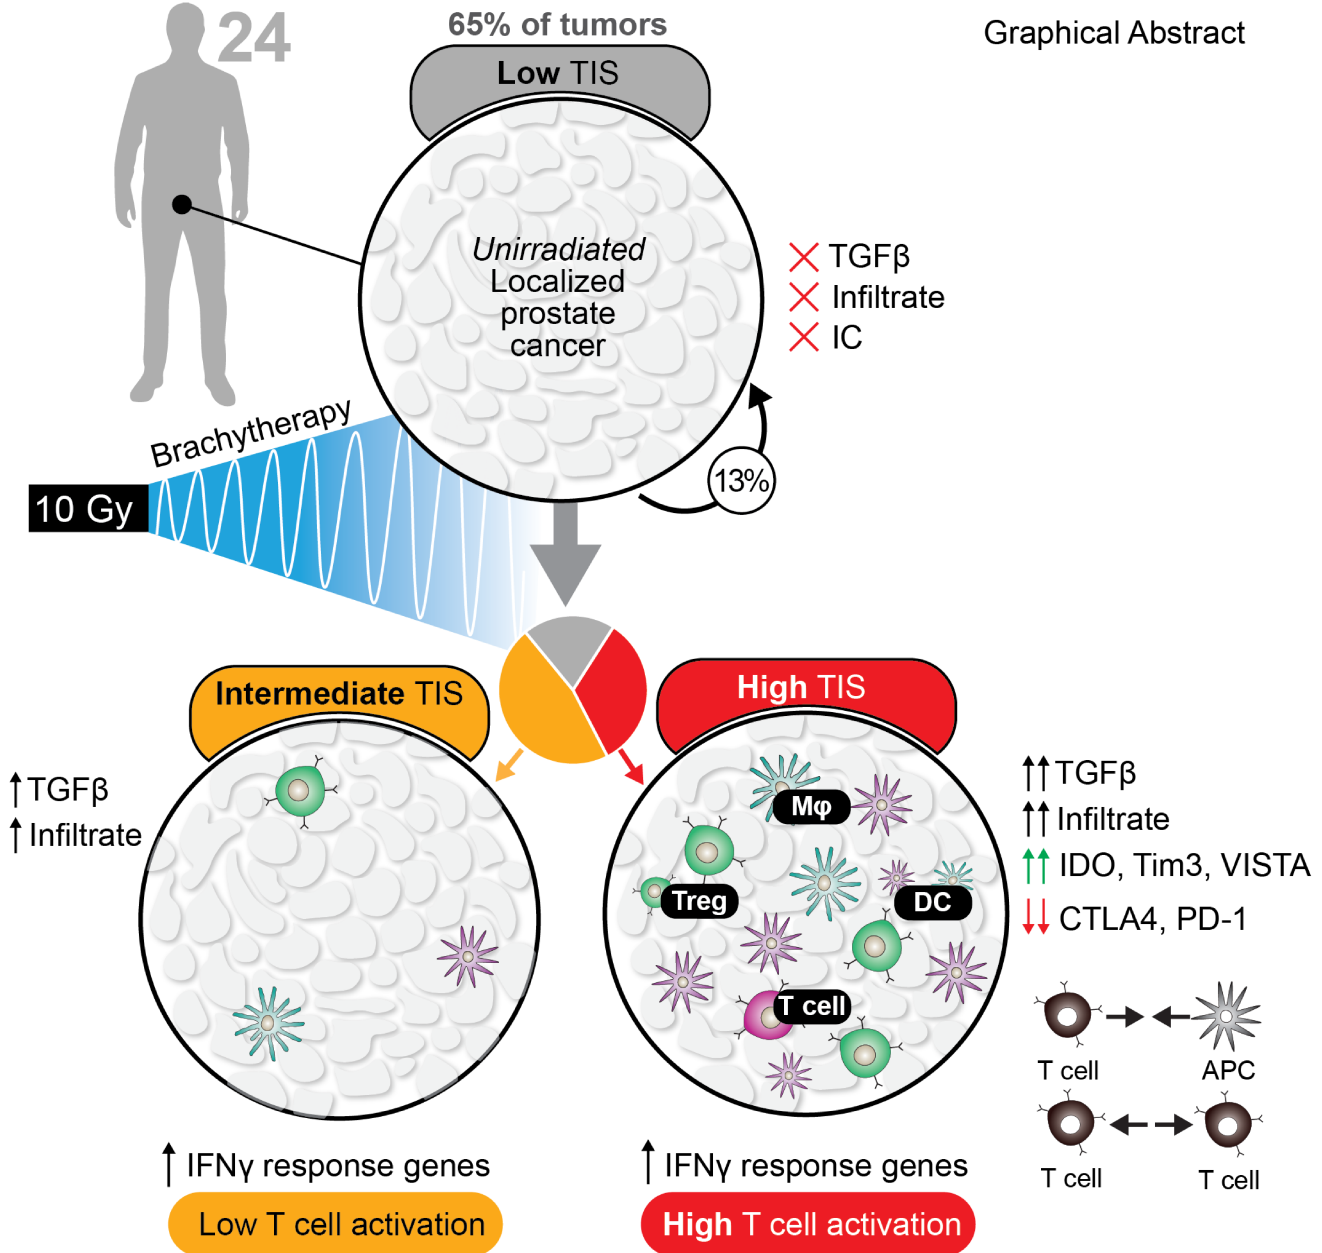

Supplement: jitc-2020-000792supp002.pdf [file jitc-2020-000792supp002.pdf]
